# Supplementary material
Source: MDPI journal article supplement (https://www.mdpi.com/2073-4344/13/9/1246)
Supplement: s1 [file s1]

## Supporting Information (SI)

Supplementary Information: 1 page, 0 table, 2 figures.

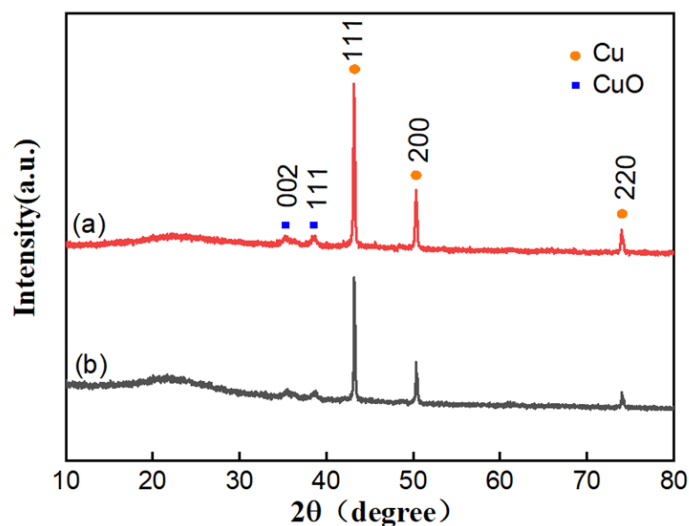

Figure S1. XRD patterns of Cu/CuO-BC before and after recycling experiment.

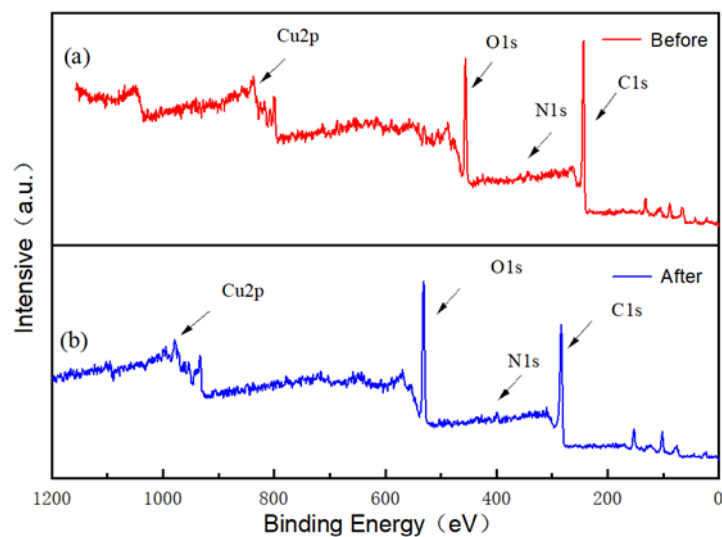

Figure S2. XPS Survey scan of Cu/CuO-BC (a) before and (b) after PMS activation.
